# Supplementary material for: Effect of ZnO on (ferroelectric) fatigue retention and thermal stability of ferroelectric properties in lead free (K0.5Na0.5)(Nb0.7Ta0.3)O3 ceramics
Source: Royal Society of Chemistry journal article supplement (doi:10.1039/c9ra06526a), 2019-01-01
Supplement: c9ra06526a1.pdf [file c9ra06526a1.pdf]

[Type text]

### XRD Refinement details

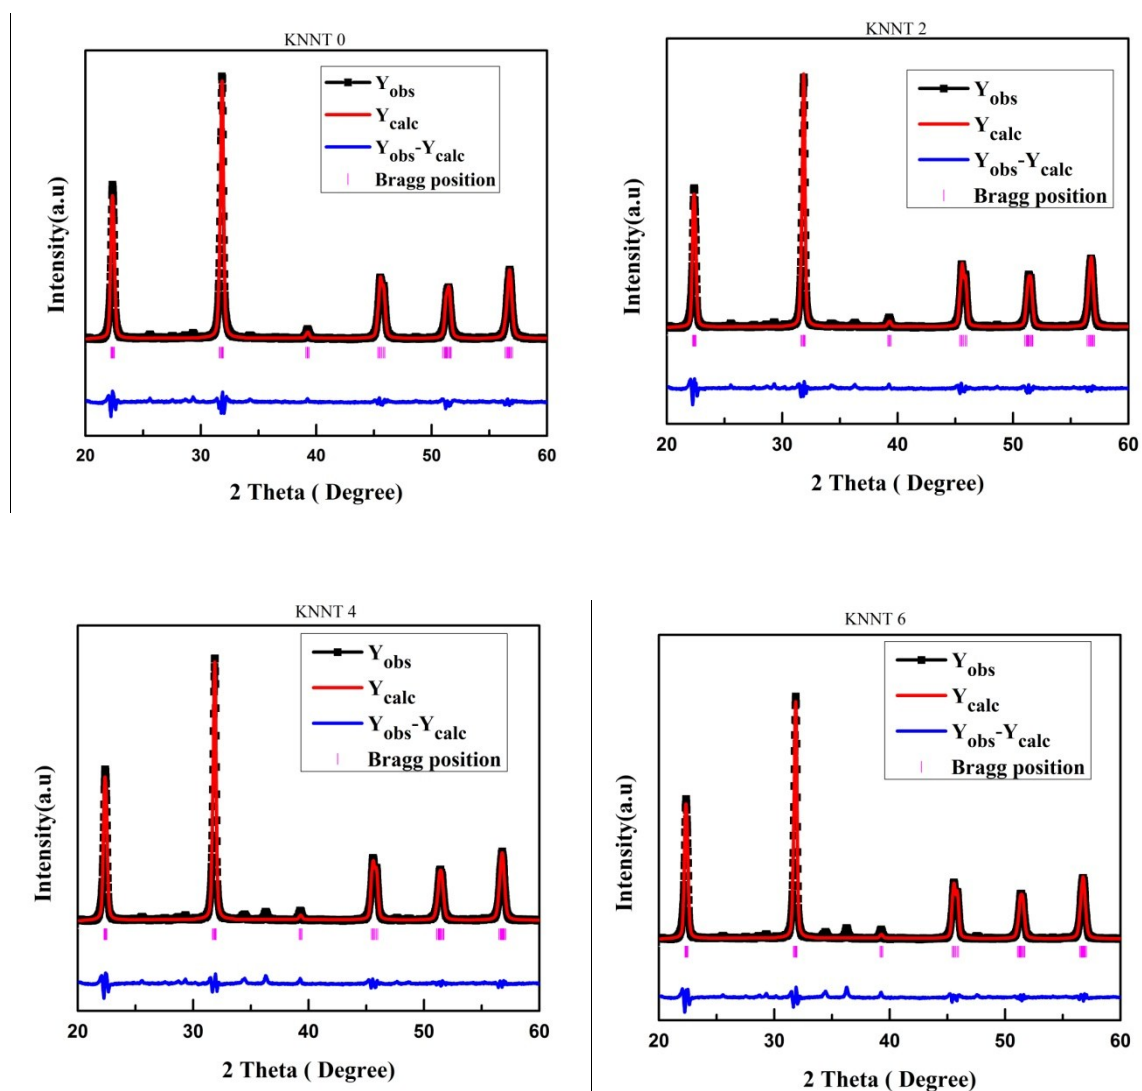

Figure 1: Shows the Rietveld refinement of XRD data for KNNT 0, KNNT 2, KNNT 4 and KNNT 6 samples.

Table 1 : Refined parameters for all the samples

| Sample Name            | KNNT 0 | KNNT 2 | KNNT 4 | KNNT 6 |
|------------------------|--------|--------|--------|--------|
| R <sub>p</sub> (%)     | 8.53   | 8.57   | 8.83   | 9.18   |
| R <sub>wp</sub> (%)    | 9.95   | 10.8   | 10.8   | 11.5   |
| R <sub>exp</sub> (%)   | 4.59   | 4.53   | 4.47   | 4.30   |
| R <sub>bragg</sub> (%) | 0.330  | 0.379  | 0.345  | 0.544  |
| R <sub>f</sub> (%)     | 0.286  | 0.314  | 0.325  | 0.410  |
| χ <sup>2</sup>         | 4.69   | 5.72   | 5.85   | 7.14   |

[Type text]

[Type text]

### EDX spectrum of KNNT 6 sample

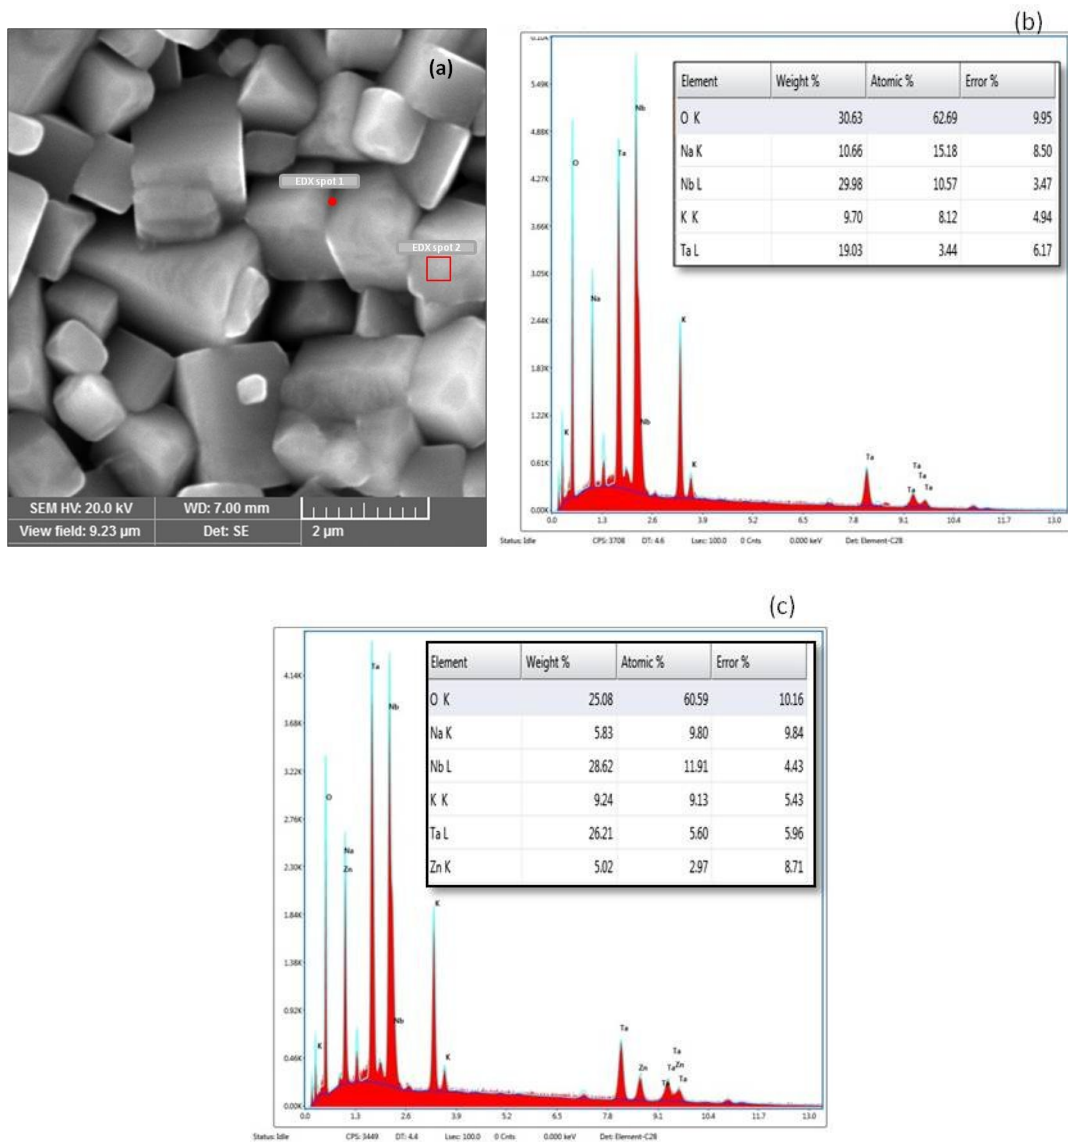

Figure. 2 (a) SEM image of KNNT 6 with EDX spot marked. EDX spectrum recorded (b) from the bulk of the grain (EDX spot 2- EDX area analysis) (c) along the grain boundary (EDX spot 1-EDX point analysis). Inset table shows the elemental composition.

[Type text]
